# Supplementary material
Source: publisher site journal article supplement (https://www.dovepress.com/article/245813)
Supplement: Supplementary file 1 [file get_supplementary_file.php]

## Supplementary data (4 Figures and 3 Tables)

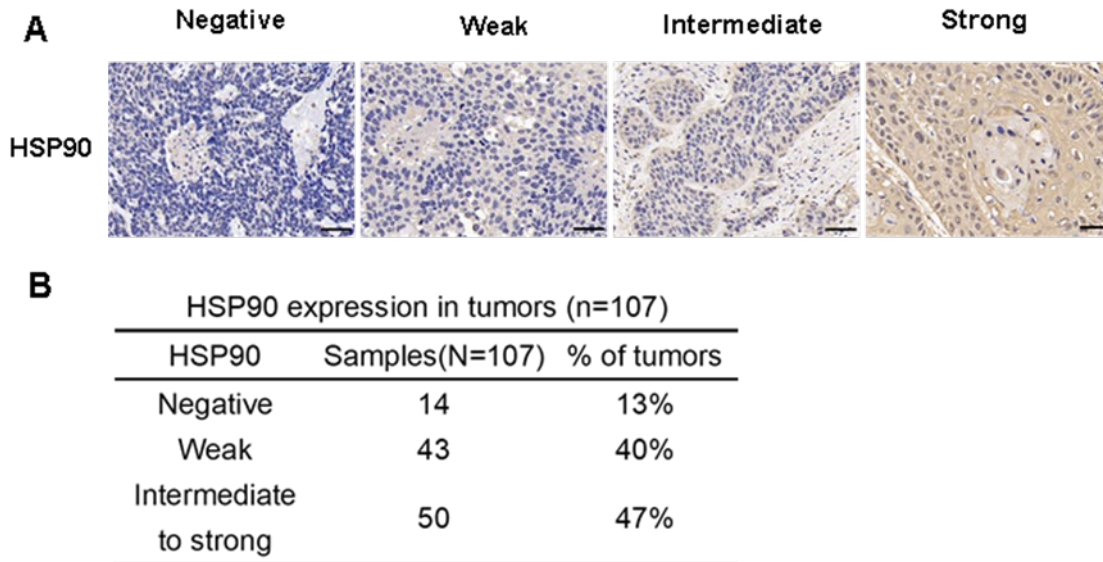

**Supplementary Figure 1:** HSP90 proteins in ESCC tissues. (A) and (B) The expression of HSP90 in ESCC. Representative images from the ESCC TMA immunostained for HSP90. Scale bars represent 50  $\mu$ m.

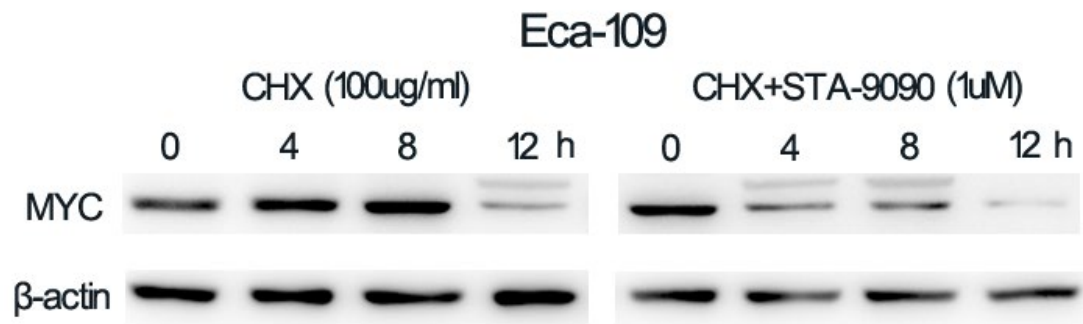

**Supplement Figure 2:** STA-9090 decreased the protein stability and half-life of MYC in Eca-109.

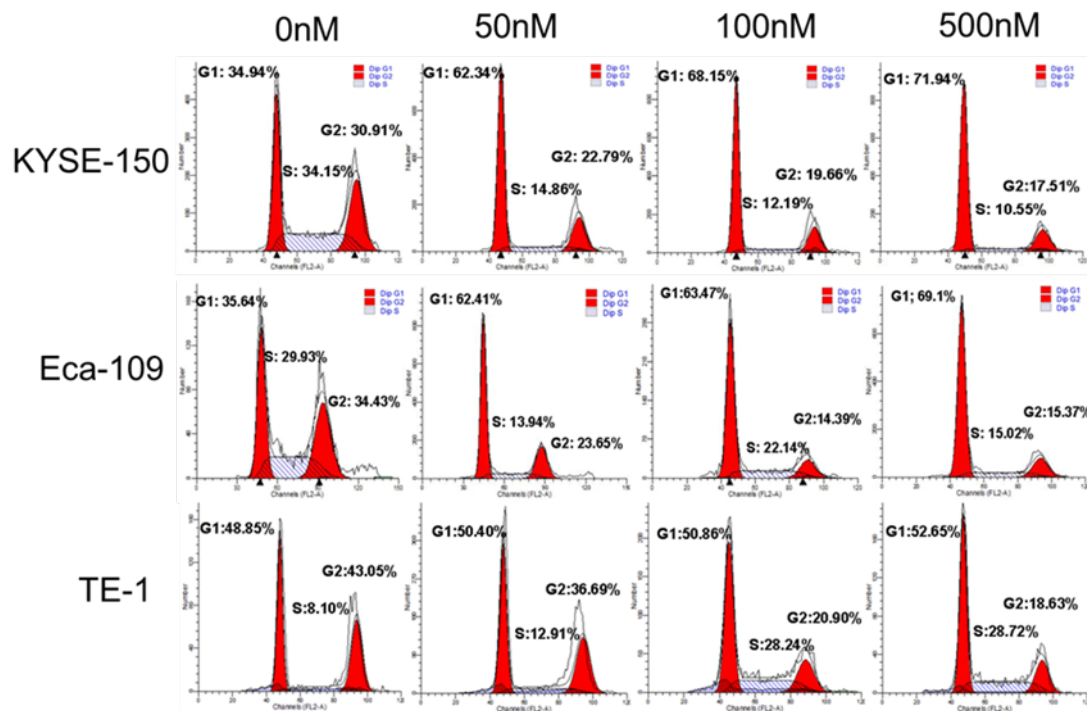

**Supplementary Figure 3:** Original results of cell cycle analyses by flow cytometry for STA-9090 treatment in KYSE-150, Eca-109 and TE-1 cell.

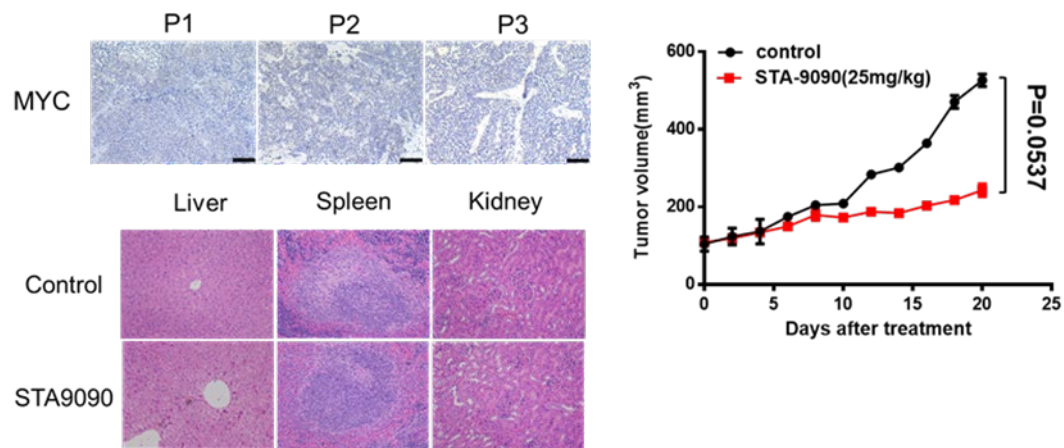

**Supplementary Figure 4:** STA-9090 treatment does not benefit mice with MYC-low expressing ESCC tumors. (A) ESCC-PDX tumors retain MYC-low expression during *in vivo* passaging. Tumor generations P1–P3. Scale bar 100um. (B) No effect of STA-9090 treatment on tumor growth in ESCC-PDX mice. (C) STA-9090 treatment does not affect the liver and spleen morphology in treated mice. Representative images from H&E staining of the livers.

**Supplementary Table1: Baseline information of patients with ESCC**

| No. | Age | Gender | TNM staging  | Differentiation |
|-----|-----|--------|--------------|-----------------|
| E1  | 58  | Female | PT3N1M0 IIIa | Moderate-poor   |
| E2  | 55  | Male   | PT3N0M0 IIa  | High            |
| E3  | 61  | Male   | CT3N3M0 IVa  | Moderate-poor   |
| E4  | 68  | Male   | PT3N0M0 IIb  | Moderate        |
| E5  | 66  | Male   | PT3N1M0 IIIa | Moderate        |
| E6  | 68  | Male   | CT3N3M1 IV   | Poor            |
| E7  | 51  | Male   | PT3N0M0 IIa  | High            |
| E8  | 54  | Female | PT3N1M0 IIb  | Moderate        |
| E9  | 66  | Male   | PT3N1M0 IIIa | Poor            |
| E10 | 56  | Male   | PT3N2M0 IIIb | Poor            |
| E11 | 56  | Female | PT3N1M0 IIIa | High            |
| E12 | 56  | Male   | PT3N0M0 IIa  | High            |

**Supplementary Table 2: qRT-PCR primers used**

| Gene   | Forward             | Reverse             |
|--------|---------------------|---------------------|
| GAPDH  | AGCCTCAAGATCATCAGC  | GAGTCCTTCCACGATACC  |
| CDKN1A | CCTGTCACTGTCTTGTACC | AATCTGTCATGCTGGTCTG |
| CDKN2B | GAGGAGAACAAGGGCATG  | GTTGACTCCGTTGGGATC  |

**Supplementary Table3. IC<sub>50</sub> of STA-9090 in ESCC cell lines (72h)**

| Cell lines            | Eca-109 | KYSE-150 | TE-13  | EC-1   | TE-1   |
|-----------------------|---------|----------|--------|--------|--------|
| IC <sub>50</sub> (nM) | 69.44   | 29.32    | 574.00 | 122.50 | 304.50 |
